# Supplementary material for: Impacts of climate and emission changes on nitrogen deposition in Europe: a multi-model study
Source: Copernicus journal article supplement (doi:10.5194/acp-14-6995-2014), 2014-07-09
Supplement: Supplementary file 1 [file acp-14-6995-2014-supplement.pdf]

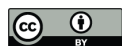

*Supplement of*

## **Impacts of climate and emission changes on nitrogen deposition in Europe: a multi-model study**

**D. Simpson et al.**

*Correspondence to:* D. Simpson (david.simpson@met.no)

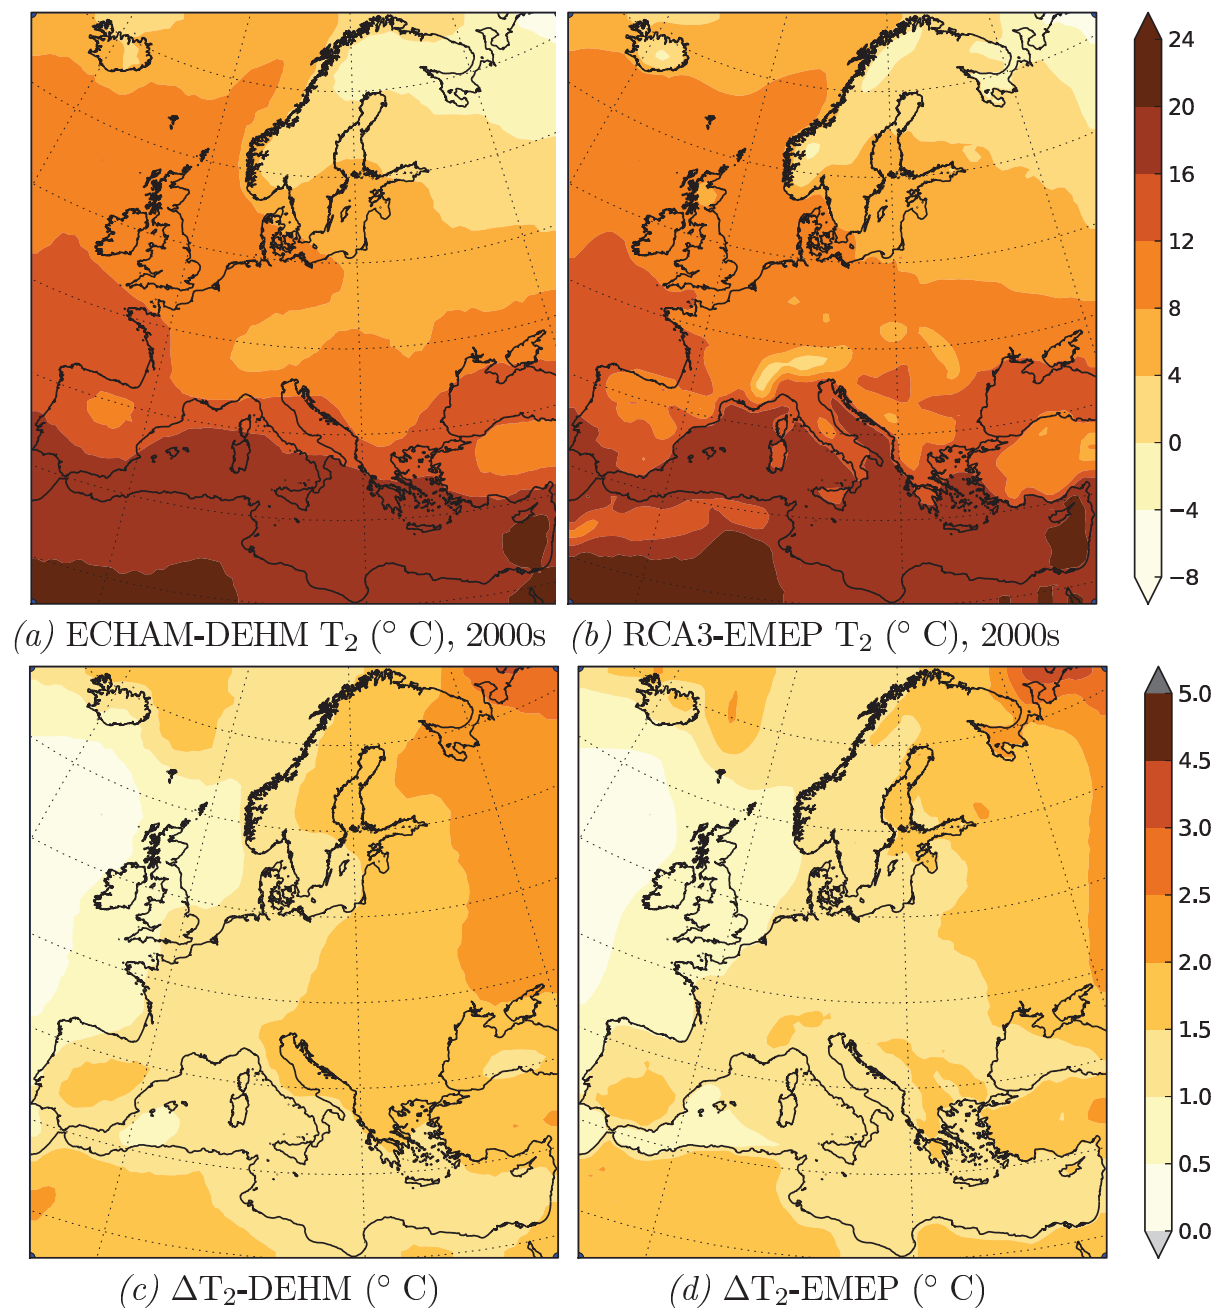

**Fig. S1.** Near-surface (2 m) temperature (top,  $^{\circ}$  C) in the 2000s simulations from the ECHAM-DEHM and RCA3-EMEP model systems, and changes (bottom row, increases positive) to the 2050s.

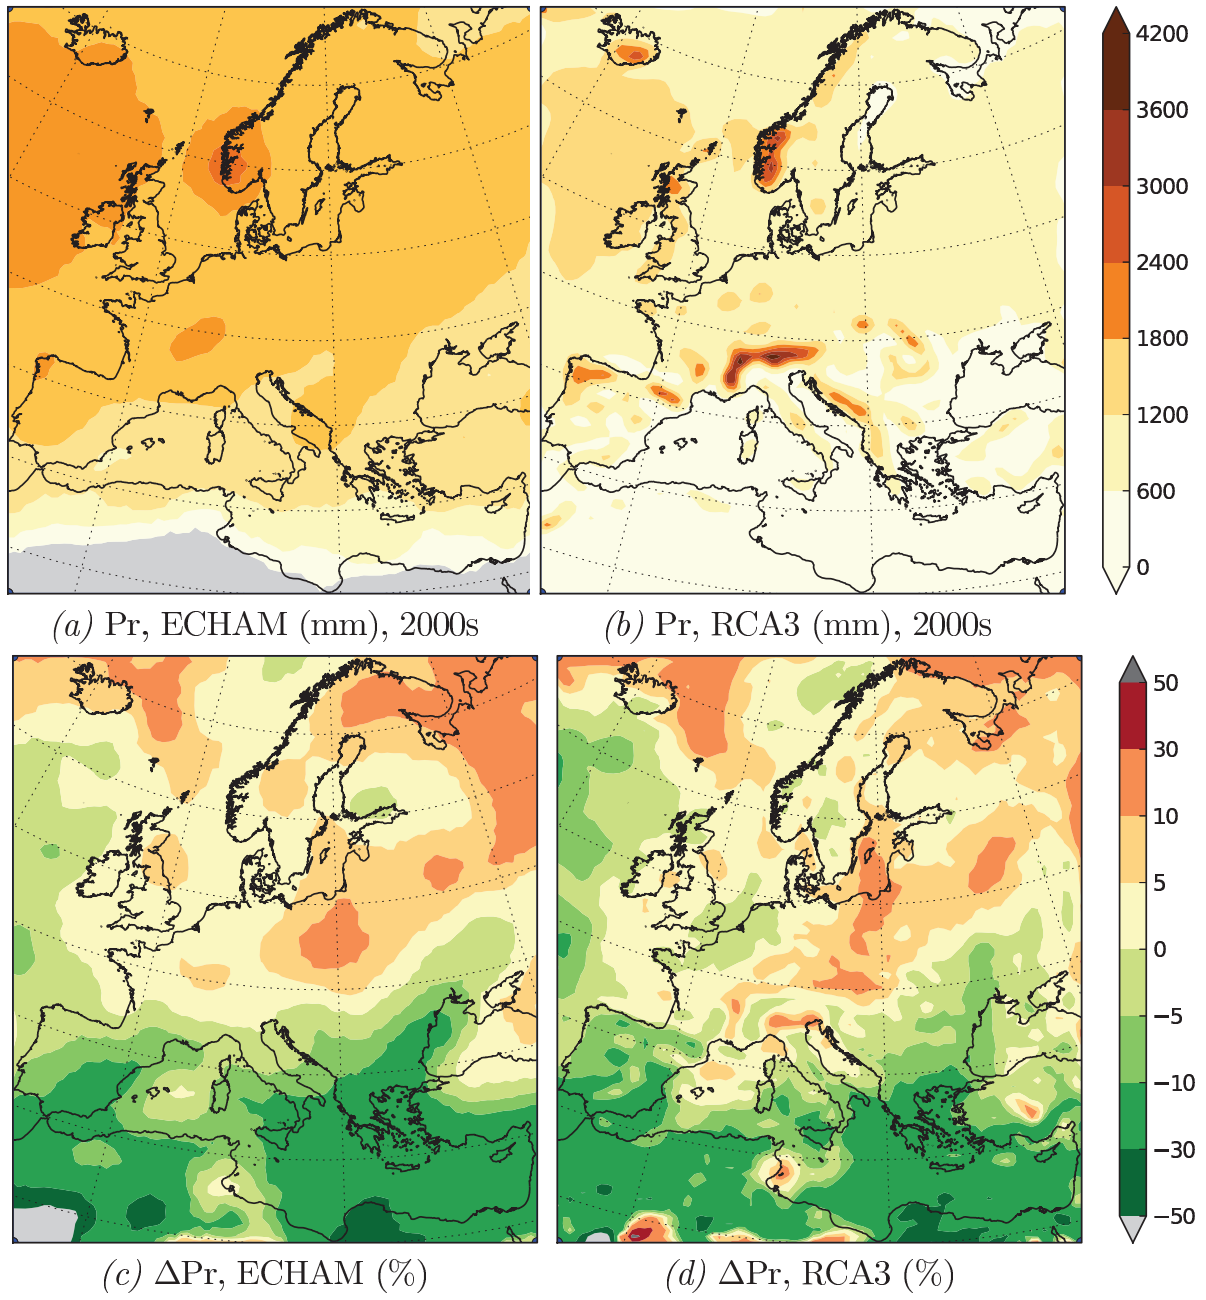

**Fig. S2.** Precipitation amount in the 2000s (top row) and percentage changes (bottom row, increases positive) to the 2050s with the global ECHAM (left) and downscaled RCA3 (right) meteorological drivers.

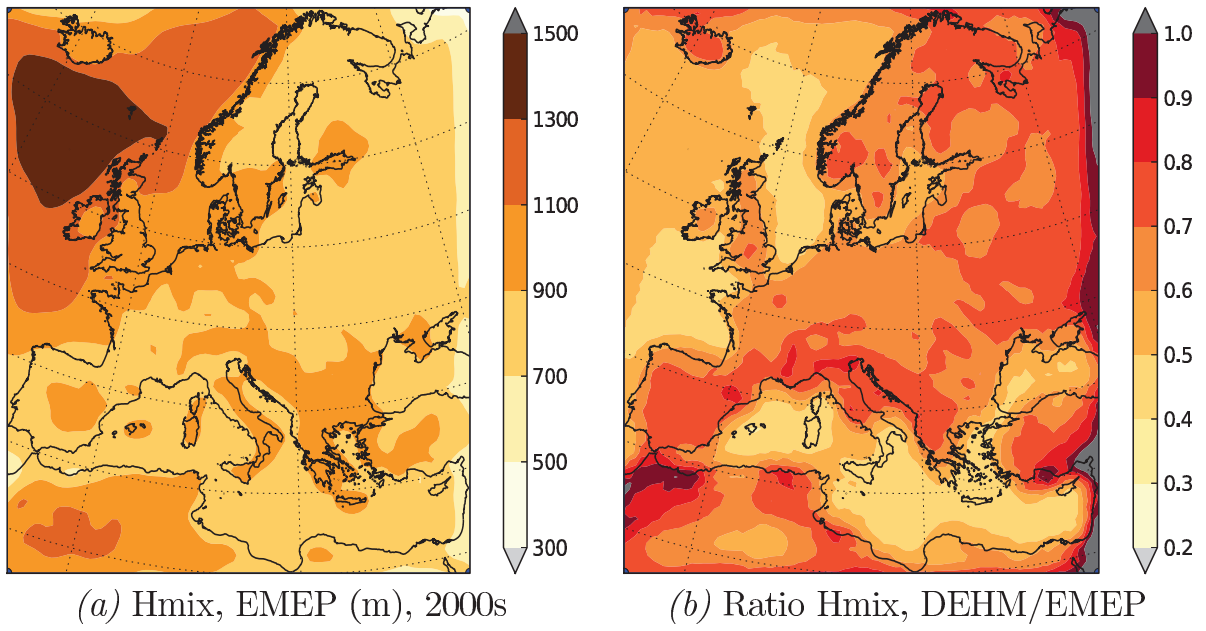

**Fig. S3.** Mean mixing height (Hmix, m) calculated with the EMEP+RCA3 models for 2000s meteorology, and ratio of Hmix calculated by DEHM+EHCAM5 to EMEP+RCA3.
